# Supplementary material for: Analysis of human breath samples of lung cancer patients and healthy controls with solid-phase microextraction (SPME) and flow-modulated comprehensive two-dimensional gas chromatography (GC × GC)
Source: Royal Society of Chemistry journal article supplement (doi:10.1039/c4ay01220h), 2014-06-30
Supplement: c4ay01220h1.pdf [file c4ay01220h1.pdf]

## Supporting Information

---

### **Analysis of human breath samples of lung cancer patients and healthy controls with solid-phase microextraction (SPME) and flow-modulated comprehensive two-dimensional gas chromatography (GC × GC)**

Hongying Ma<sup>a</sup>, Xiang Li<sup>a</sup>, Jianmin Chen<sup>a</sup>, Huijie Wang<sup>b</sup>, Tiantao Cheng<sup>a</sup>, Kai Chen<sup>c</sup>, Shifen Xu<sup>c</sup>

<sup>a</sup>*Shanghai Key Laboratory of Atmospheric Particle Pollution and Prevention (LAP3), Department of Environmental Science & Engineering, Fudan University, Shanghai 200032, China*

<sup>b</sup>*Department of Medical Oncology, Fudan University Shanghai Cancer Center, 270 Dong An Road, Shanghai 200032, China*

<sup>c</sup>*Agilent Technologies (Shanghai) Co. Ltd., USA*

\*Corresponding author. Tel.: +8621-65642521; fax: +8621-65642080

E-mail address: lixiang@fudan.edu.cn (X. Li).

## Supporting Information

---

**Table S1.** GC×GC Chromatographic Conditions

---

**GC×GC: Agilent 7890A FID**

---

**Carrier:** Hydrogen, constant flow

**Inlet:** Pulsed splitless; 250 °C

**Inlet liner:** Deactivated dual taper direct connect

**Column 1:** J&W 122-5532 : 60 m × 250 μm × 0.25 μm DB-5ms, 0.8 mL/min

**Column 2:** Agilent 19091N-030: 5 m × 250 μm × 0.15 μm HP-INNOWax, 21 mL/min

**Oven:** 50 °C (1 min) to 150 °C (15 °C/min), hold 15 min, 150 °C to 220 °C (10 °C/min), hold 5 min

**Modulator period:** modulator period 1.5 seconds, 1.4 seconds collect (sampling time), 0.10 s injection time. ,

**Detection:** FID at 200 Hz, 250 °C, H<sub>2</sub> 20 mL/min, Air 400 mL/min, N<sub>2</sub> 25 mL/min.

**Processing software:** GC-image software, Version 2.1, Zoex Corporation, Pasadena, TX ,USA,

---

## Supporting Information

**Table S2:** Retention time, linear ranges (LR), limit of detection(LOD), regression equation (Y, Peak volume; X, concentration), correlation coefficient and relative standard deviation (RSD) for the studied compounds.

| No. | Targets  | Retention Time<br>(T <sub>a</sub> , T <sub>b</sub> )(min) | LR<br>(µg/L) | LOD<br>(µg/L) | Regression equation    | Correlation<br>coefficient | RSD <sup>a</sup><br>(%) |
|-----|----------|-----------------------------------------------------------|--------------|---------------|------------------------|----------------------------|-------------------------|
| 1   | Methanol | (17.4, 0.9)                                               | 0.05-2.5     | 0.01          | $y = 11.7x + 87.4$     | 0.9447                     | 5                       |
| 2   | Pentane  | (18.8, 0.9)                                               | 0.05-2.5     | 0.01          | $y = 23.8x + 15.4$     | 0.9247                     | 6                       |
| 3   | Acetone  | (19.3, 0.8)                                               | 0.1-5        | 0.1           | $y = 37.7x + 122.1$    | 0.9496                     | 3                       |
| 4   | Isoprene | (19.6, 0.9)                                               | 0.1-5        | 0.1           | $y = 257.2x + 501.5$   | 0.9748                     | 4                       |
| 5   | Propanol | (21.2, 0.9)                                               | 0.1-20       | 0.1           | $y = 1495.9x + 2723.5$ | 0.9533                     | 5                       |

a) The RSD experiments were carried out five times using GC×GC under the same conditions.

**Table S3.** Pearson correlation between BMW and Methanol, Pentane, Acetone, Isoprene, Propanol.BMW

|                         | Methanol | Pentane | Acetone | Isoprene | Propanol |
|-------------------------|----------|---------|---------|----------|----------|
| Correlation coefficient | 0.339    | 0.287   | -0.086  | 0.134    | 0.272    |
| P-Value                 | 0.097    | 0.164   | 0.681   | 0.522    | 0.189    |

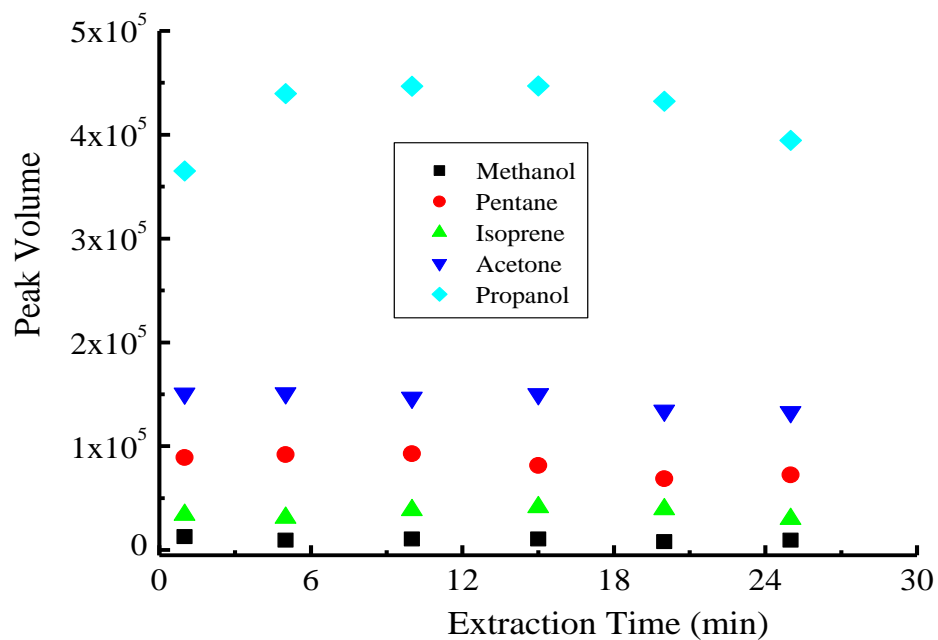

**Fig. S1.** Effect of the extraction time on the signal intensity of target compounds. Conditions: concentration, 500 ng L<sup>-1</sup>; extraction temperature, 25 °C; injection temperature, 250 °C; desorption time, 3min.

## Supporting Information

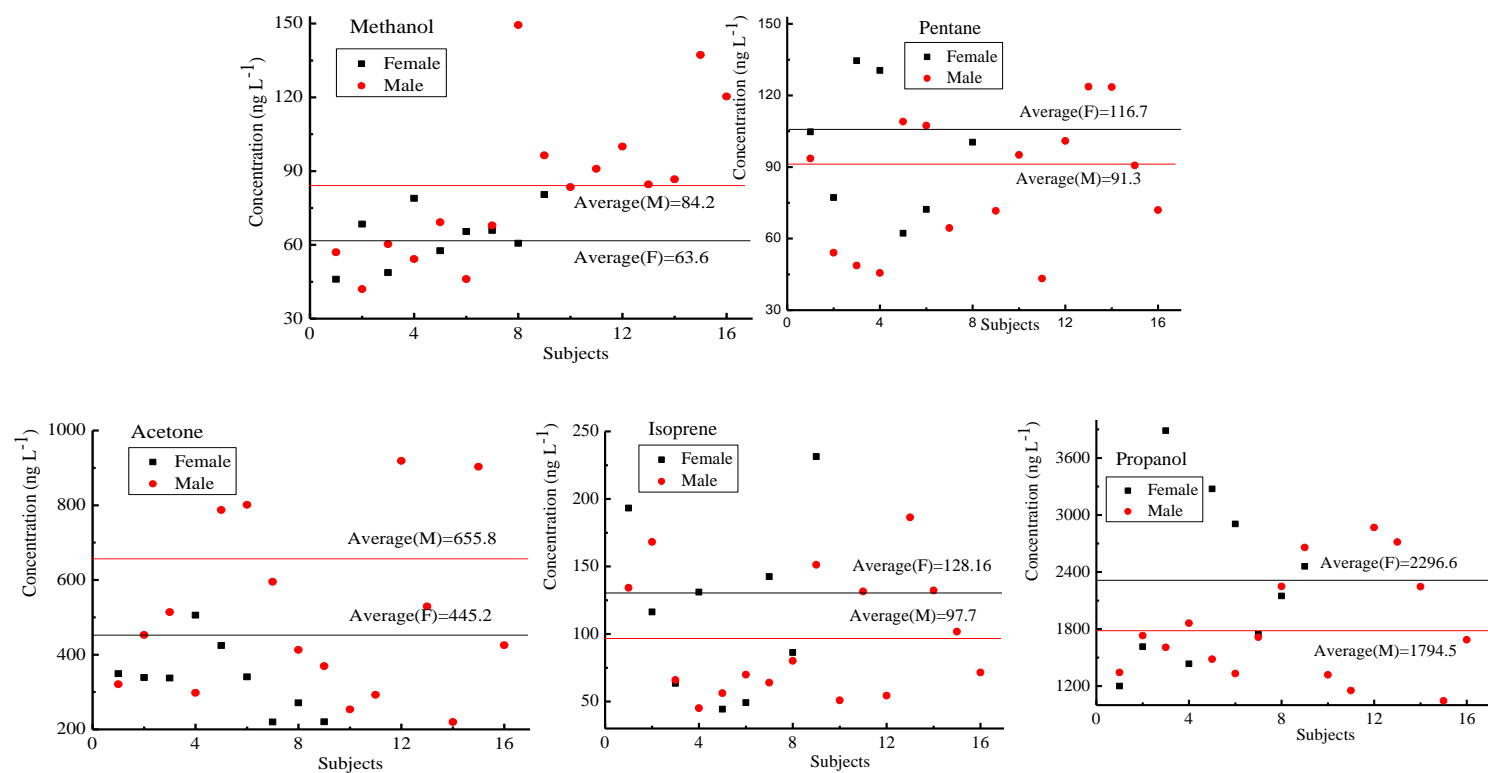

**Fig. S2.** A plot of the mean breath VOCs concentration against the gender of health controls.

## Supporting Information

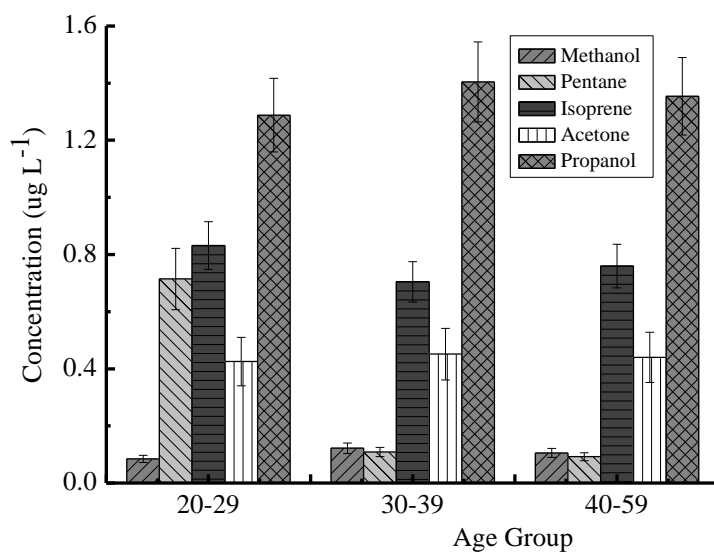

**Fig. S3.** Concentration of breath target compounds classified by the different age group of the controls. The controls are divided into three age groups (20-29, 30-39, 40-59).

## Supporting Information

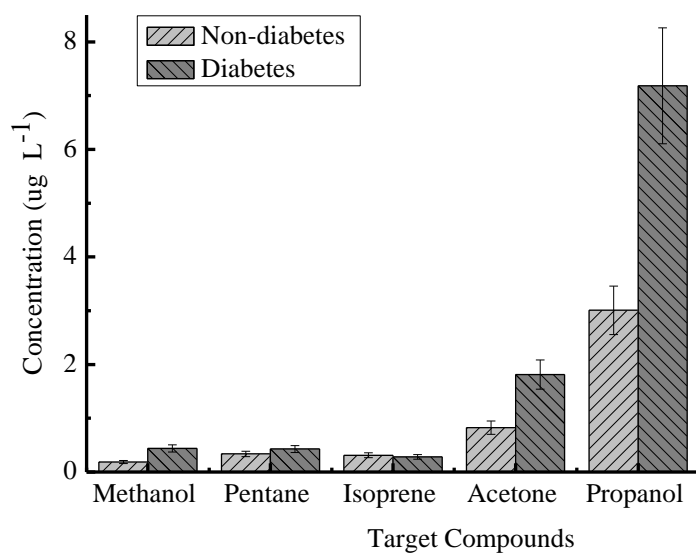

**Fig. S4.** Comparison of target compounds concentrations between diabetes and non-diabetes

## Supporting Information

---

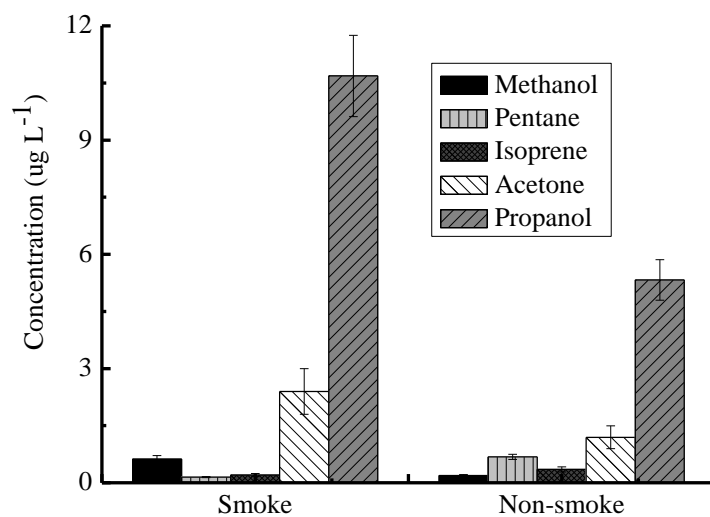

**Fig. S5.** Influence of the smoke on the extraction of methanol, pentane, isoprene, acetone, propanol.
